# Supplementary material for: Silicananoparticles efficiently catalyzed synthesis of quinolines and quinoxalines
Source: Royal Society of Chemistry journal article supplement (doi:10.1039/c1cy00332a), 2011-10-27

### 1. General procedure for the synthesis of quinoxalines:

A mixture of aryl 1,2-diamine (1 mmol), 1,2-diketone (1 mmol) and silica NPs (0.6 g) in a mortar were ground vigorously at room temperature. After completion of the reaction, as monitored by TLC, the reaction mixture was transferred to a 25 mL round-bottomed flask and hot ethanol (10 mL) was added to it and centrifuged for 20 min to separate the silica nanoparticles. The supernatant was concentrated to 5 mL, and allowed to stand at room temperature for 4-5 h. During this time, the product was precipitated and then collected on a sintered glass funnel and washed with ethanol and dried. After the isolation of the product, hot ethanol was added to the recovered silica nanoparticles and centrifuged silica nanoparticles were dried and successfully used for the next run under identical reaction conditions. For compounds **3u** and **3v**, ethyl acetate was used instead of ethanol during the catalyst separation.

### 2. General procedure for the synthesis of quinolines:

A well-ground mixture of 2-aminoaryl ketone (1 mmol), carbonyl compound (1.2 mmol) and silica NPs (0.5 g) in a test tube was irradiated in a microwave oven at 600 W (100 °C) for the times reported in Table 3. Afterward, the reaction mixture was cooled to room temperature and warm EtOAc (30 mL) was added to it. Then the reaction mixture was concentrated to 10 mL and centrifuged for 20 min to separate the silica nanoparticles. After evaporation of the solvent from the supernatant, the resulting solid was recrystallized from EtOH to give the pure product. EtOAc (10 mL) was added to the recycled silica nanoparticles and centrifuged (two times). Finally, the silica nanoparticles dried and reused for the next run.

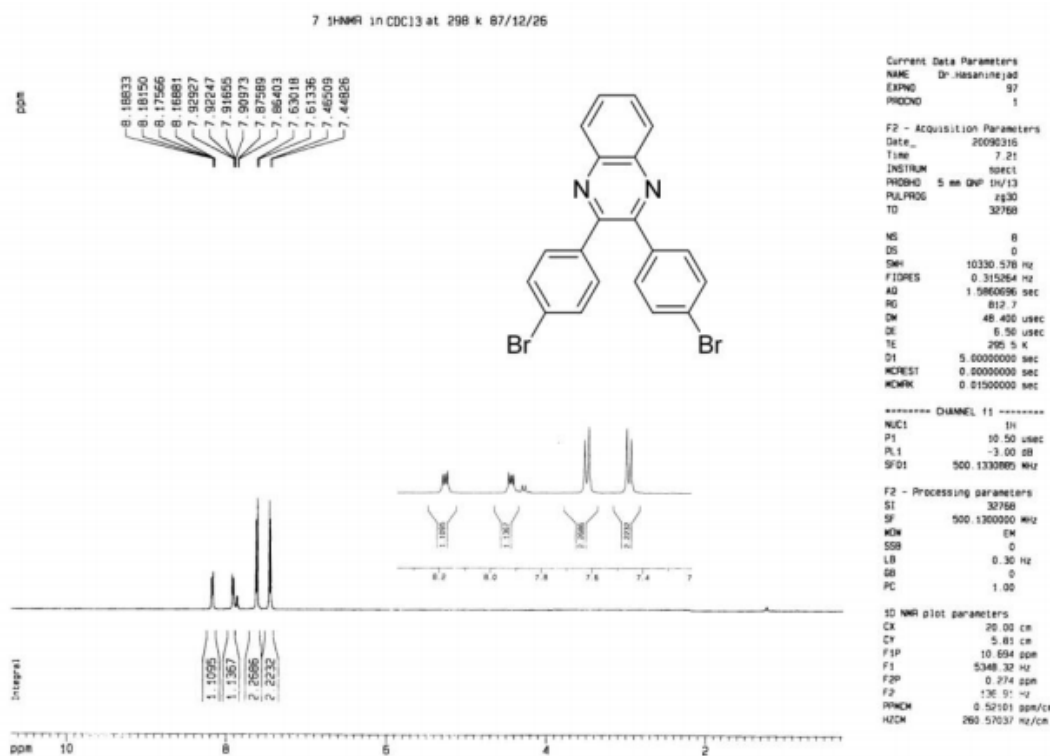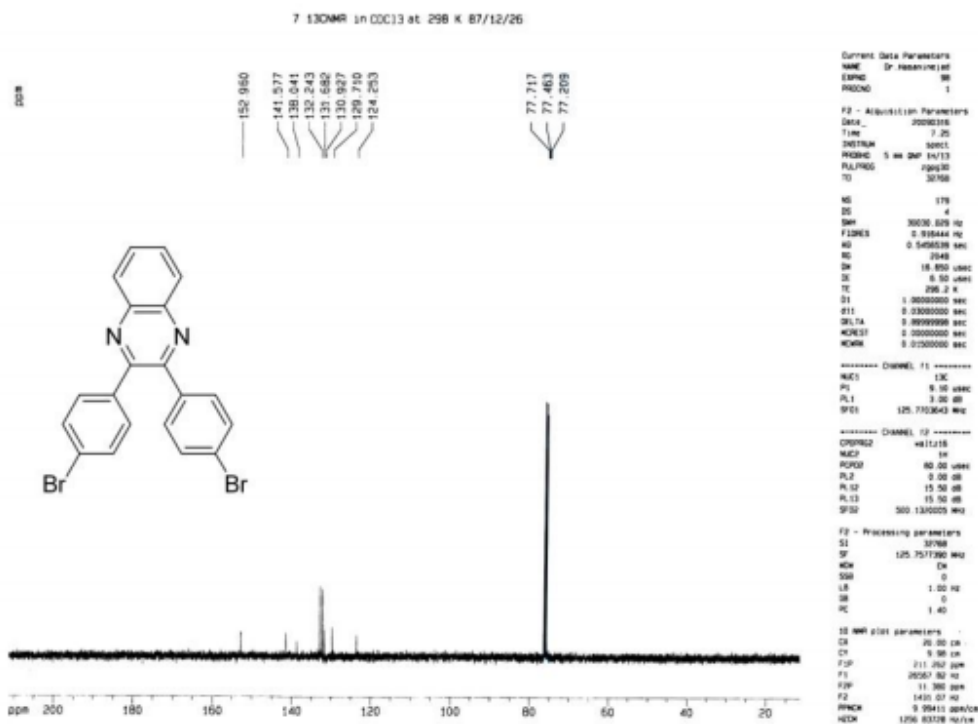

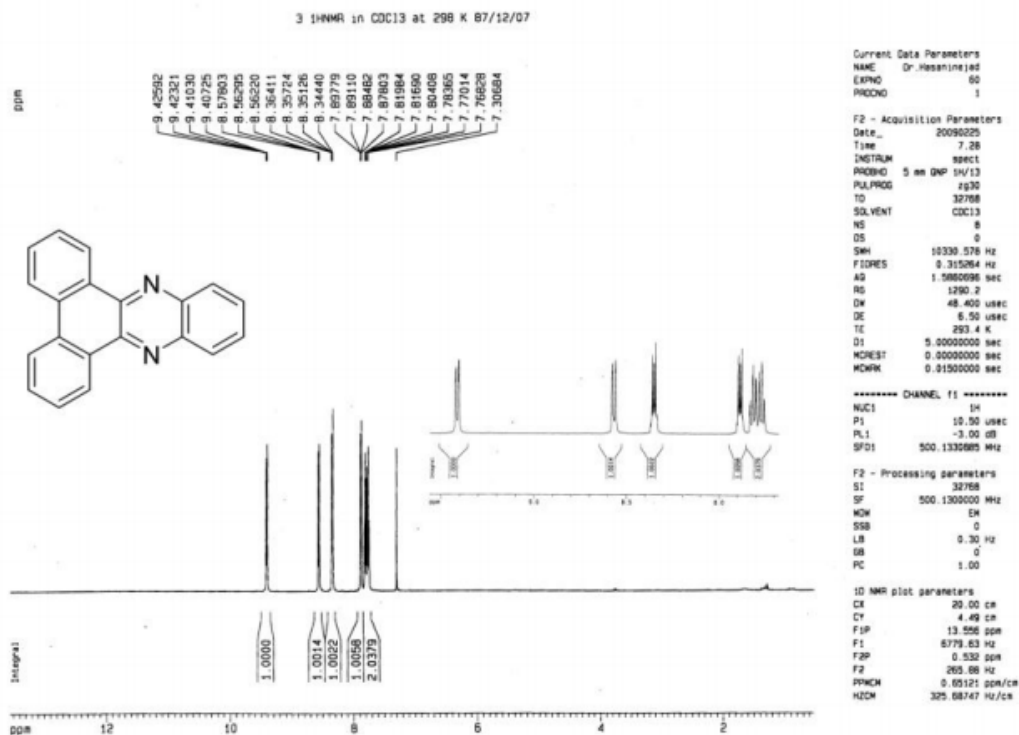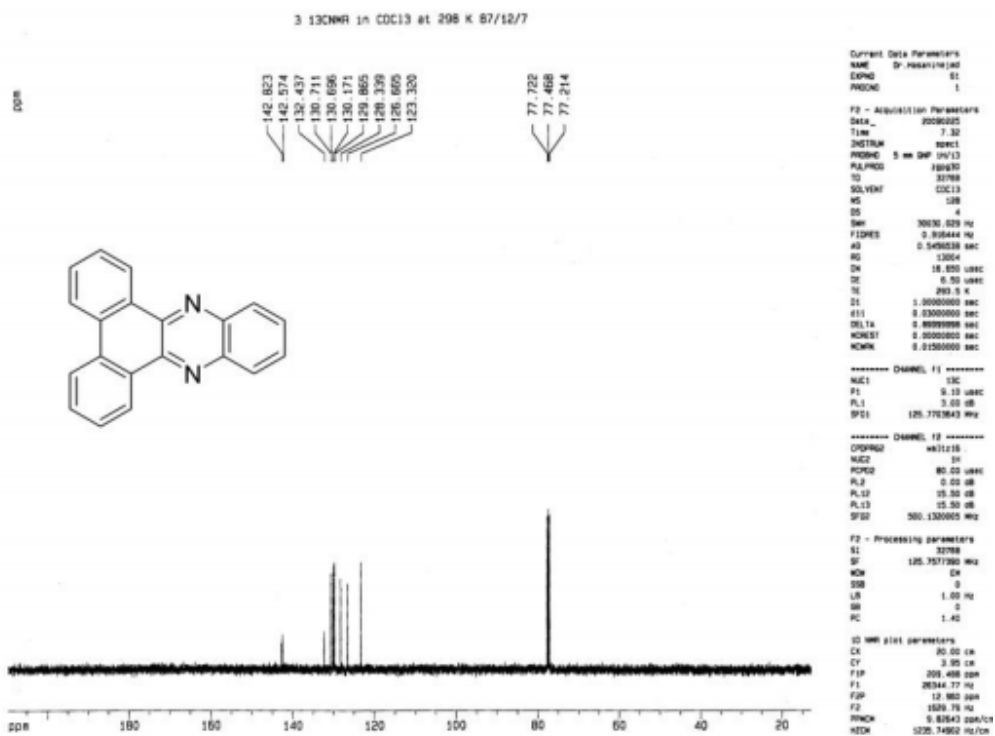

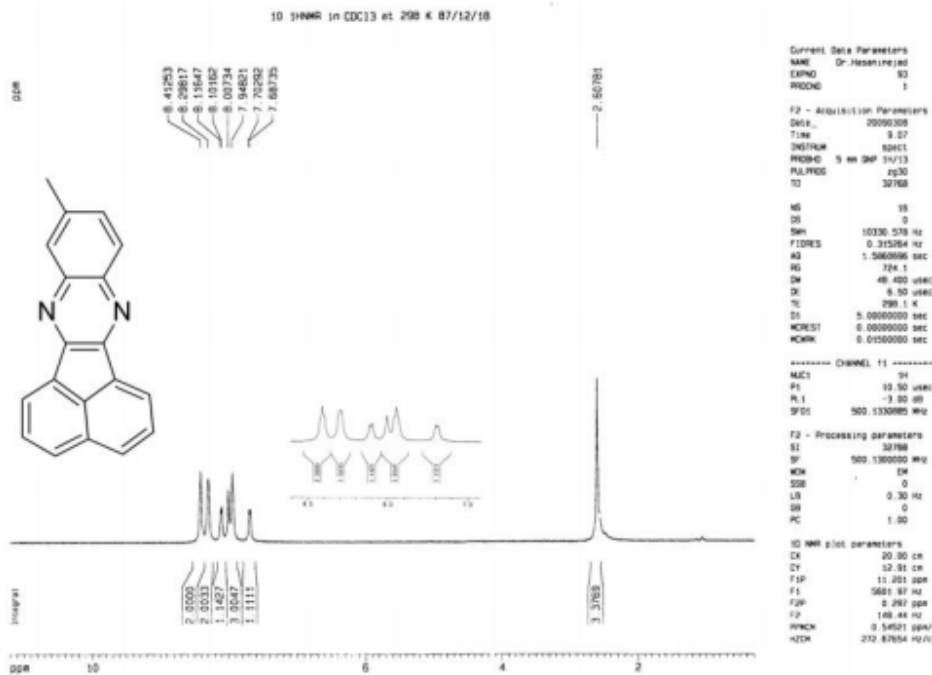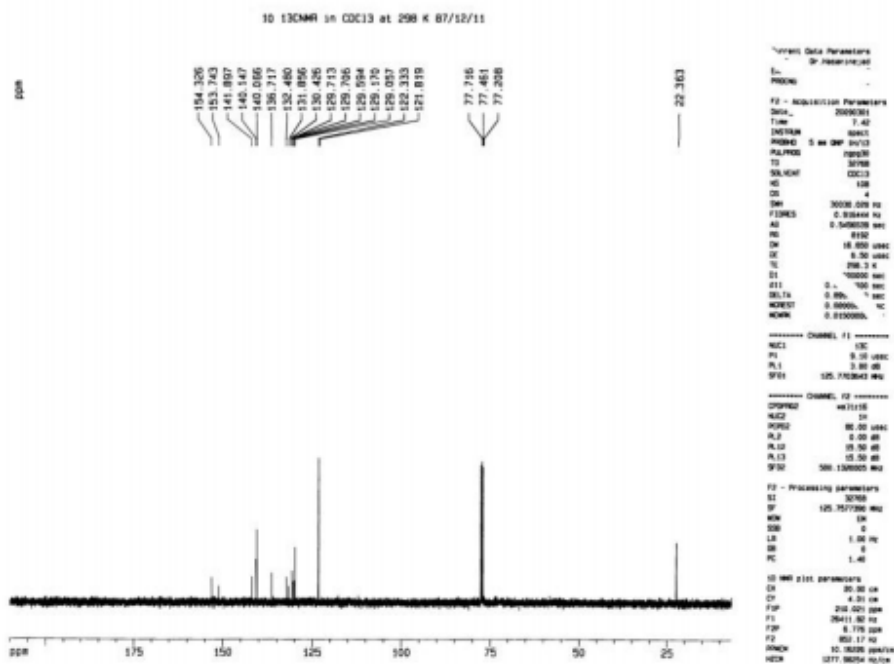

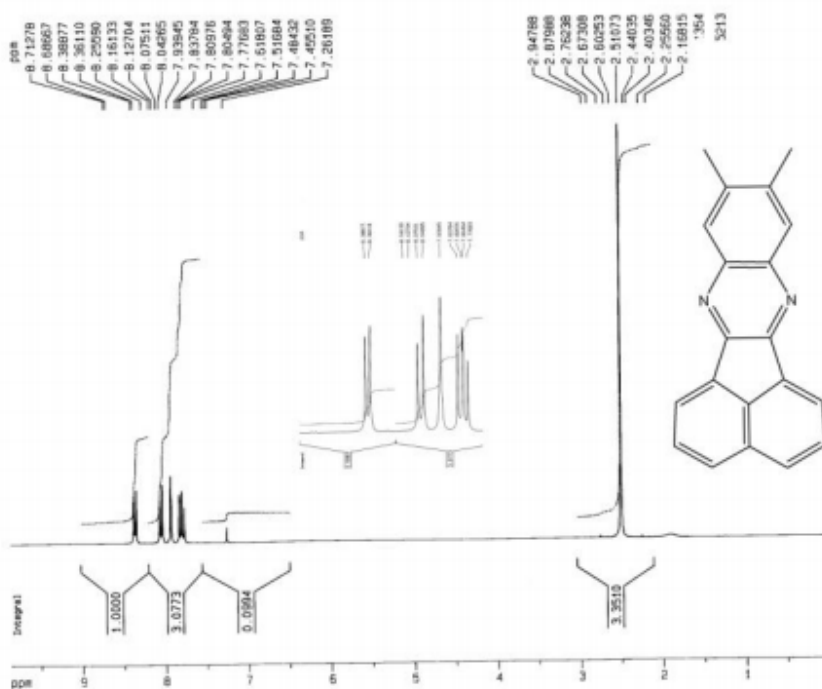

Current Data Parameters

```

EXPNO 1
PROCNO 1

F2 - Acquisition Parameters
Date_ 20080302
Time 10.41
INSTRUM spect
PROBHD 5 mm QNP 13C/
PULPROG zgpg30
TD 298368
SOLVENT CDCl3
NS 10
DS 0
SWH 7485.030 Hz
FIDRES 0.250018 Hz
AQ 1.9999084 sec
RG 512
DM 66.800 usec
DE 6.00 usec
TE 300.2 K
SI 1.0000000 sec
MORST 0.0000000 sec
MORW 0.0150000 sec

===== CHANNEL f1 =====
NUC1 13C
P1 11.70 usec
PL1 -3.00 dB
SFO1 250.1315447 MHz

F2 - Processing parameters
SI 32768
SF 250.1330000 MHz
WDW EM
SSB 0
LB 0.30 Hz
GB 0
PC 1.50

1D NMR plot parameters
CX 20.00 cm
CY 30.00 cm
FQP 0.875 ppm
F1 2471.03 Hz
F2 -0.04 ppm
F3 -0.90 Hz
PUNCH 0.49413 ppm/Hz
HCLK 123.59893 Hz/Hz
    
```

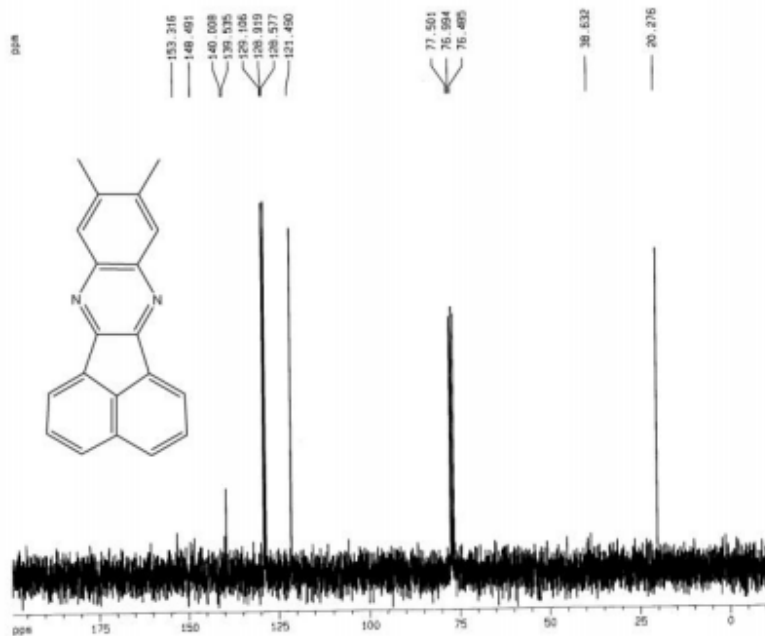

Current Data Parameters

```

EXPNO 1
PROCNO 1

F2 - Acquisition Parameters
Date_ 20080302
Time 10.38
INSTRUM spect
PROBHD 5 mm QNP 13C/
PULPROG zgpg30
TD 298368
SOLVENT CDCl3
NS 10
DS 0
SWH 15066.241 Hz
FIDRES 0.209801 Hz
AQ 2.1799051 sec
RG 512
DM 31.200 usec
DE 6.00 usec
TE 300.2 K
SI 2.0000000 sec
MORST 0.0000000 sec
MORW 0.0000000 sec
MORX 0.0000000 sec

===== CHANNEL f1 =====
NUC1 13C
P1 16.50 usec
PL1 0.00 dB
SFO1 62.9020000 MHz

===== CHANNEL f2 =====
CHPROG zgpg30
NUC2 1H
PULPROG zgpg30
P12 17.00 usec
PL12 17.00 dB
PL13 17.00 dB
SFO2 250.1330000 MHz

F2 - Processing parameters
SI 32768
SF 62.8952700 MHz
WDW EM
SSB 0
LB 1.00 Hz
GB 0
PC 1.50

1D NMR plot parameters
CX 20.00 cm
CY 30.00 cm
FQP 190.157 ppm
F1 12008.40 Hz
F2 -11.598 ppm
F3 -793.81 Hz
PUNCH 10.133000 MHz/Hz
HCLK 882.49146 MHz/Hz
    
```

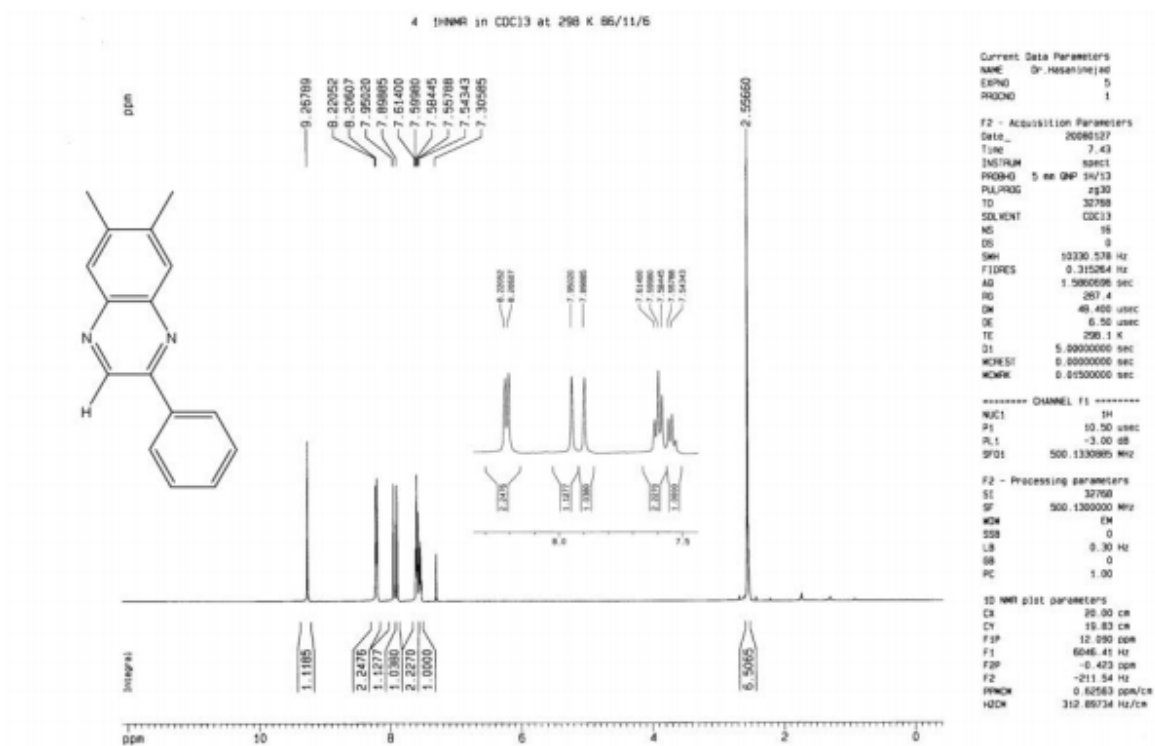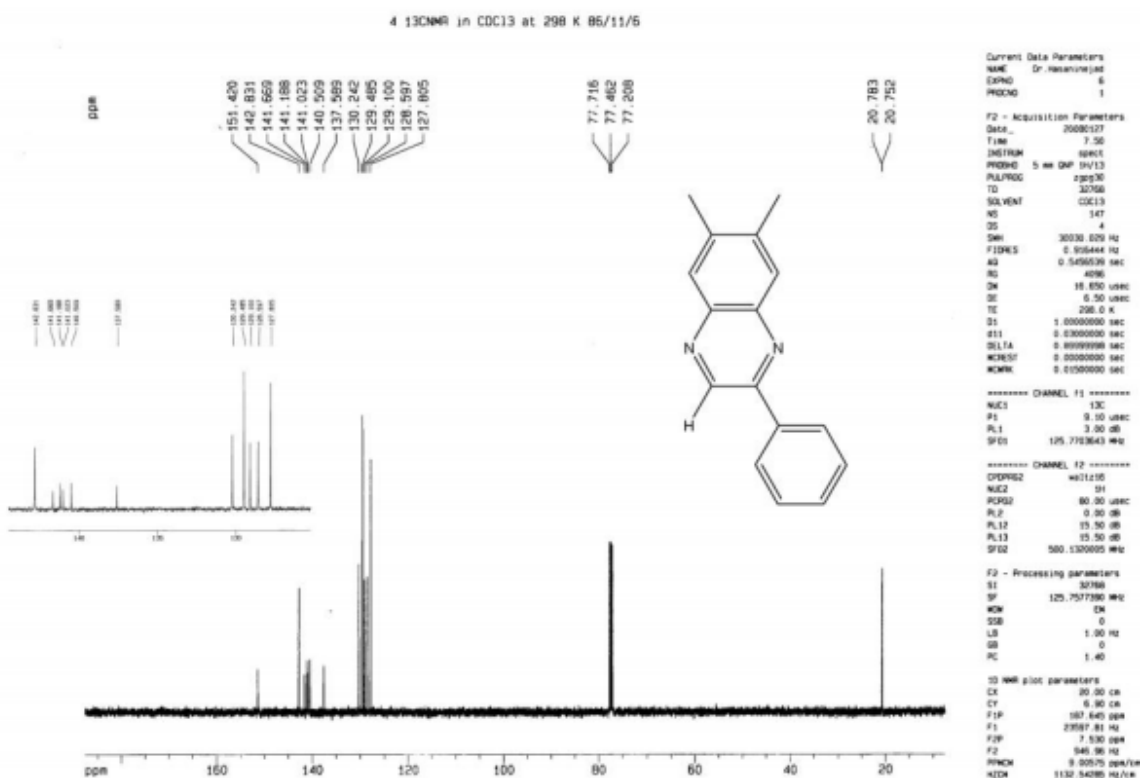

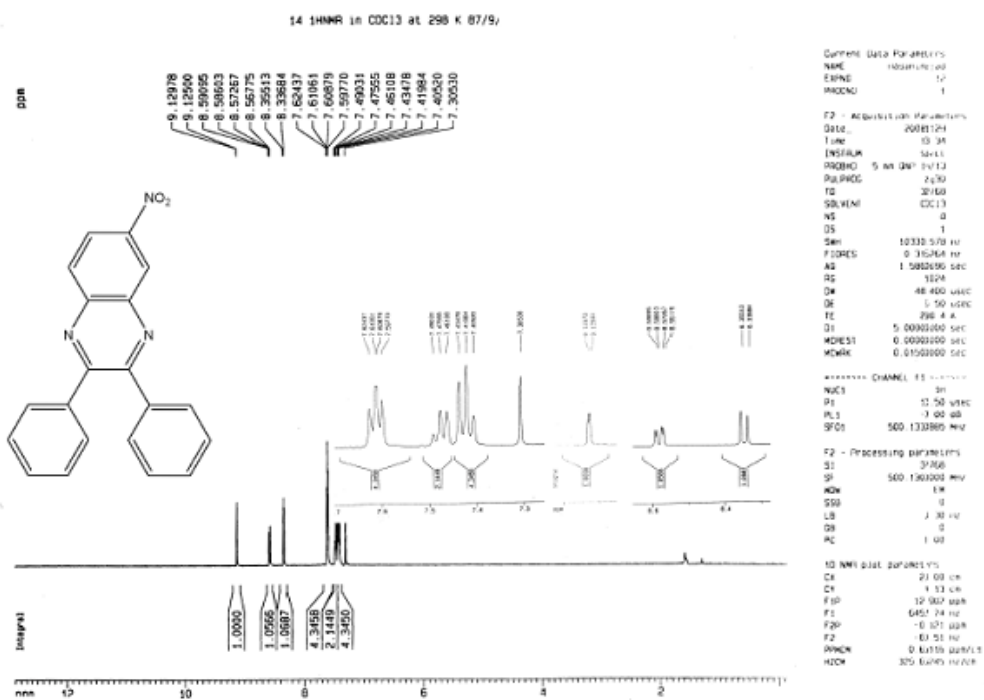

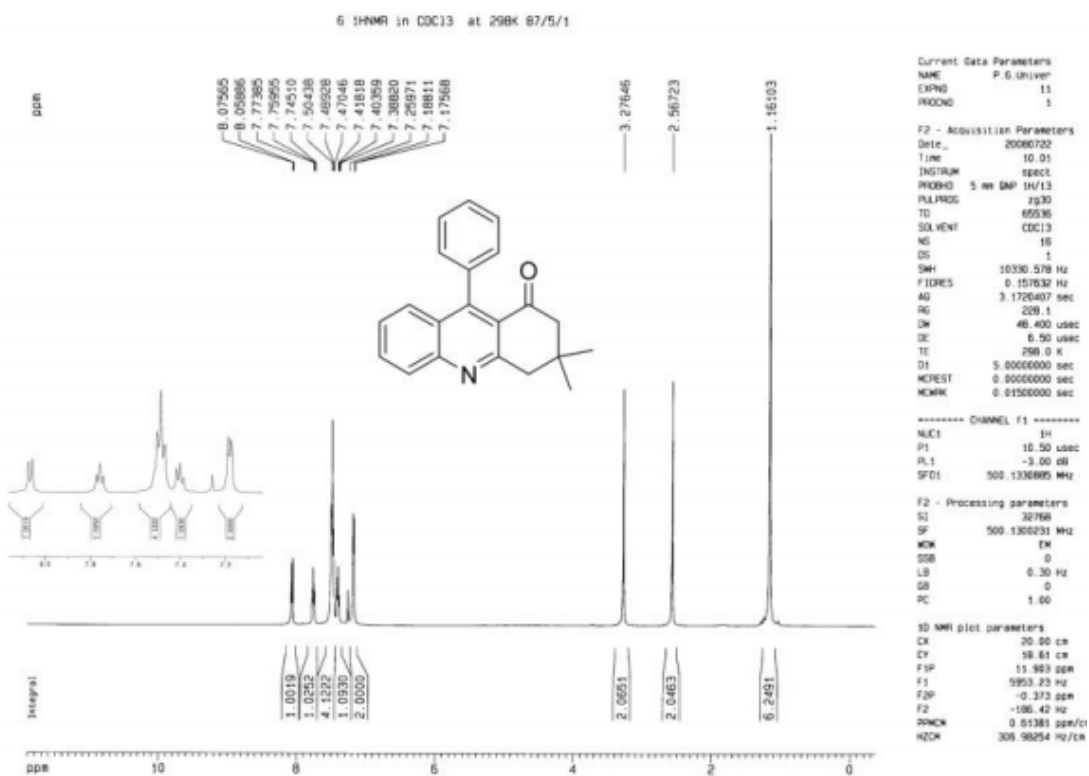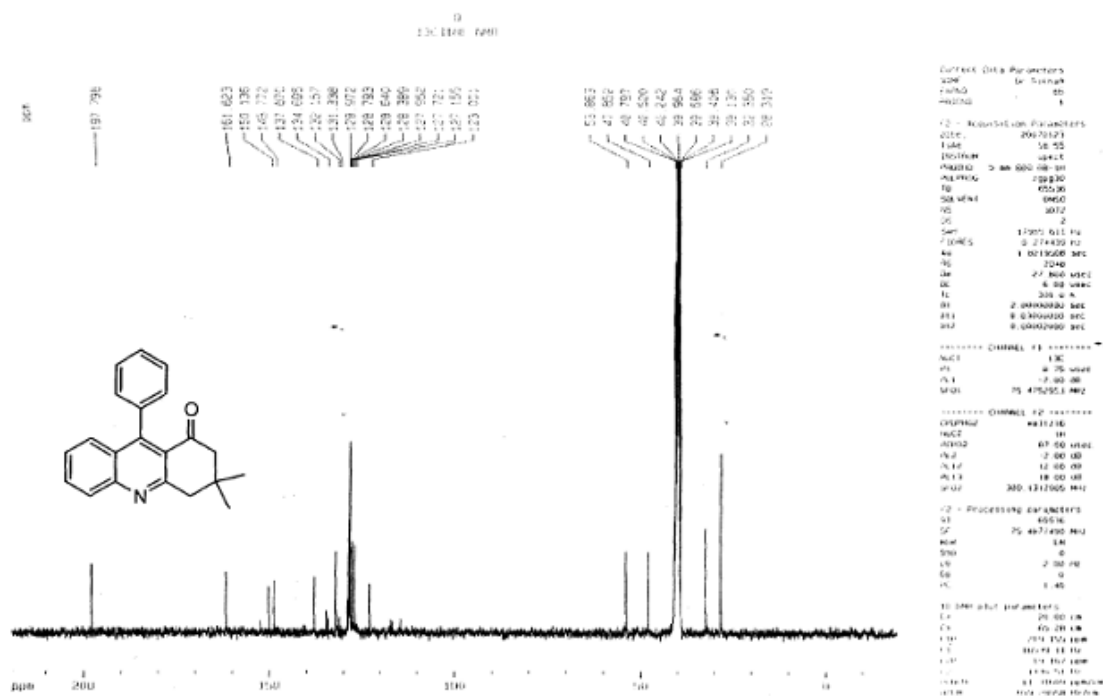



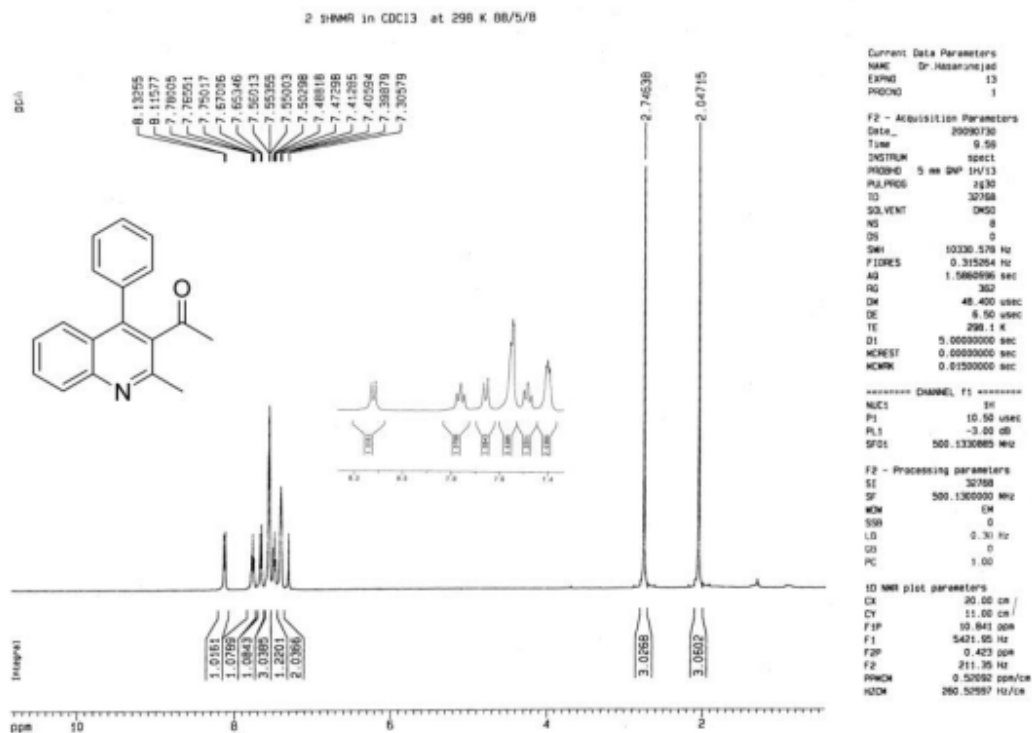

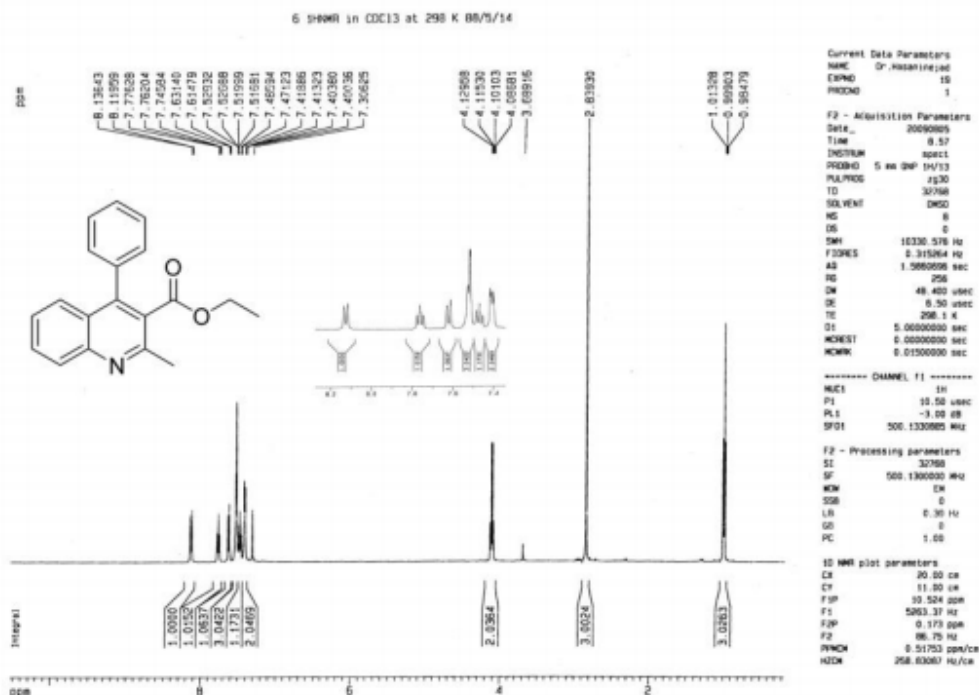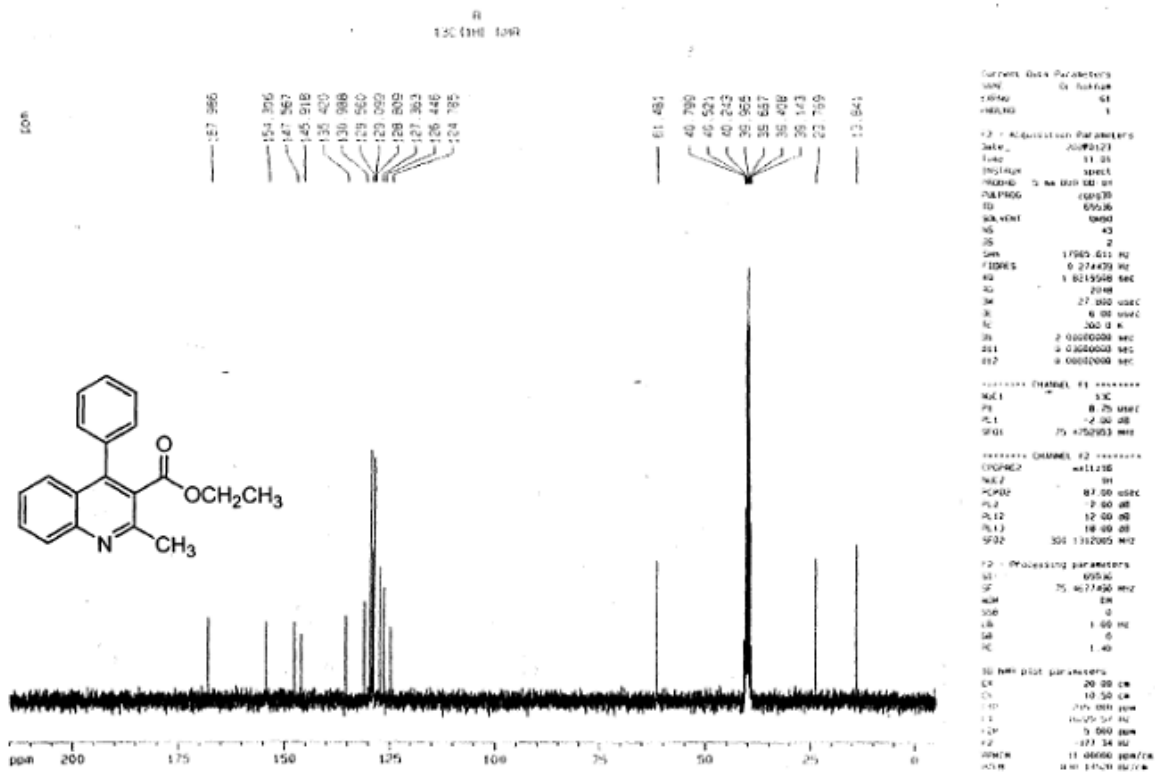

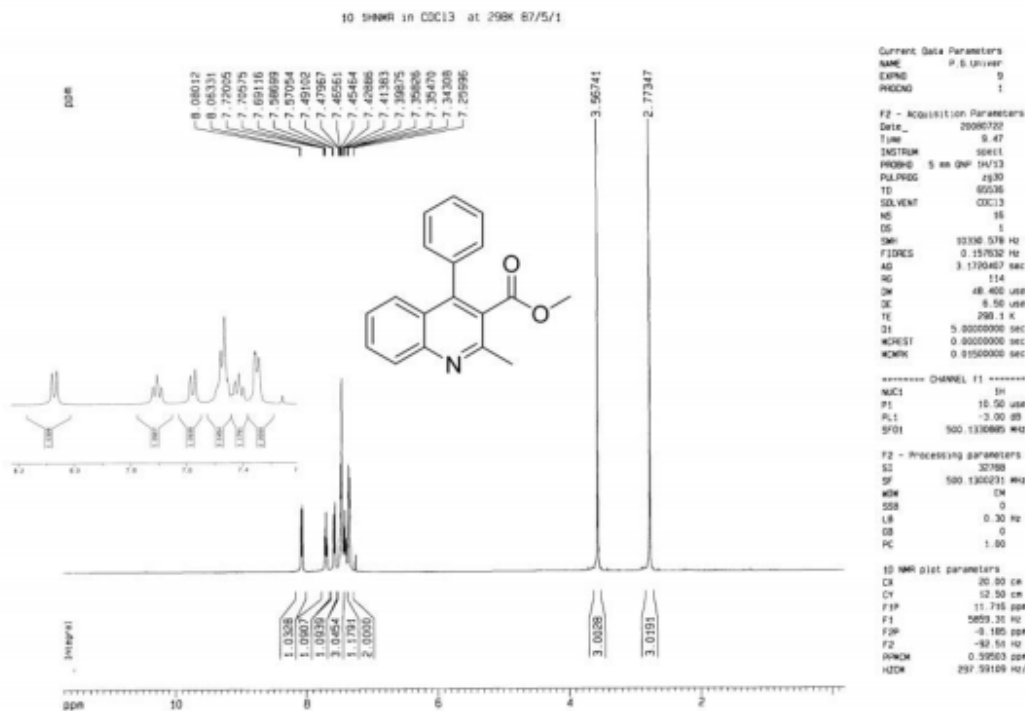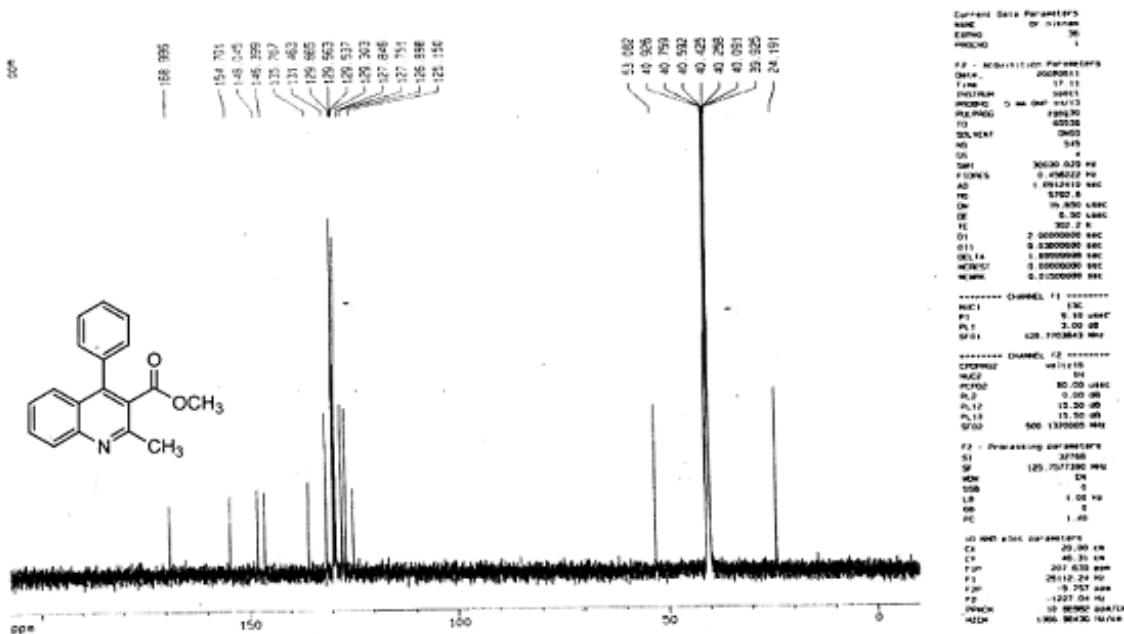

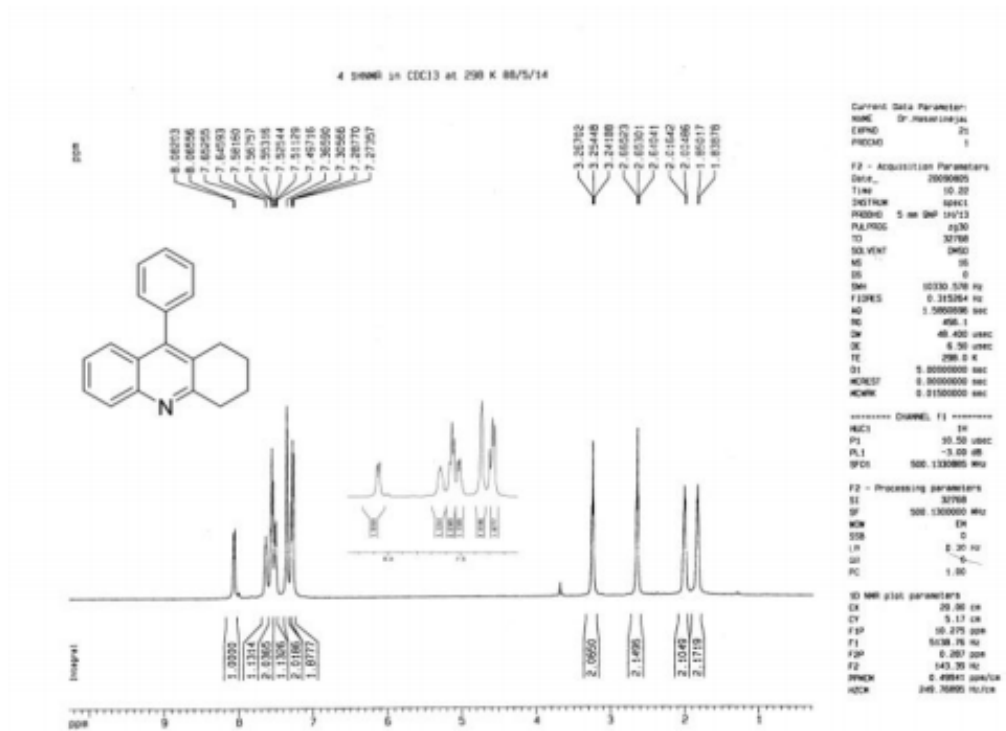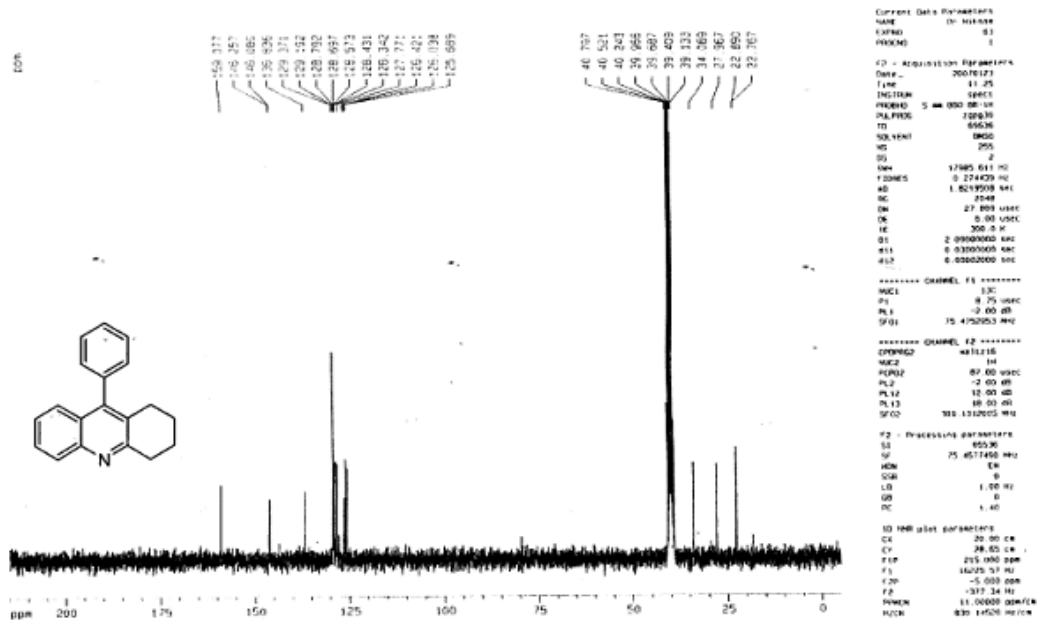

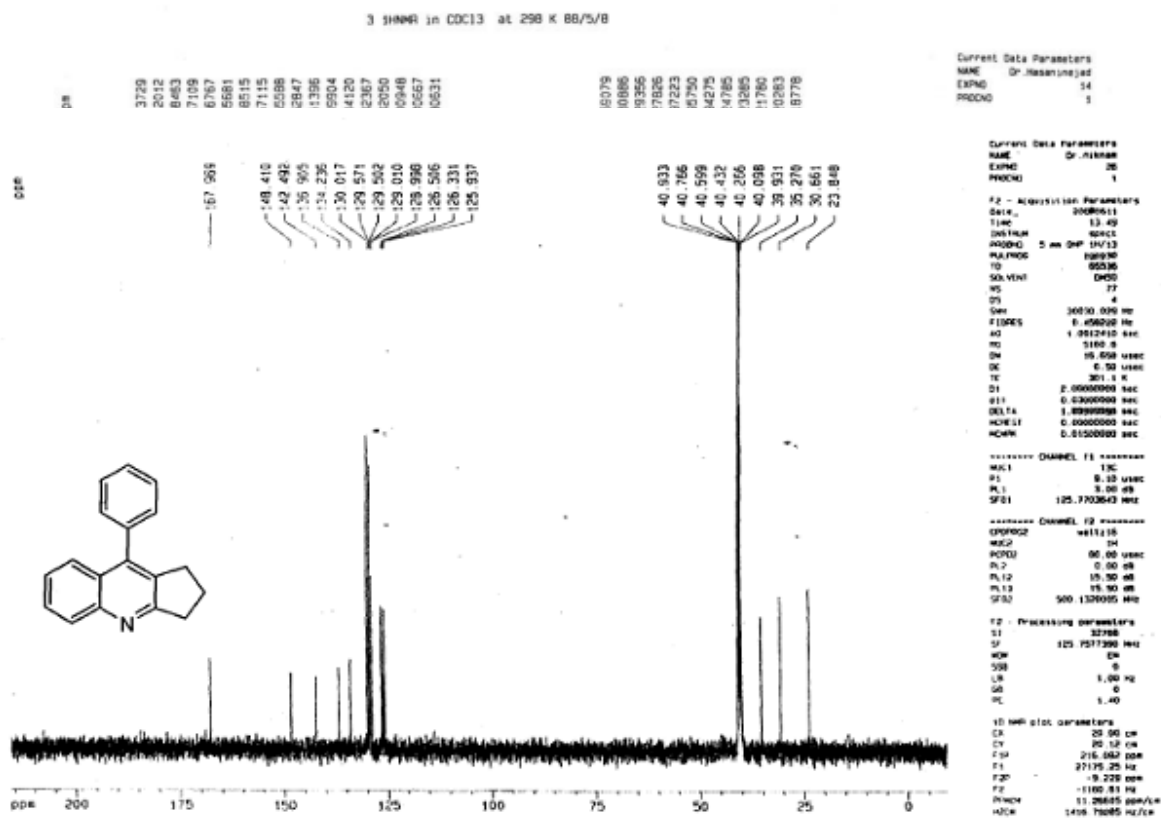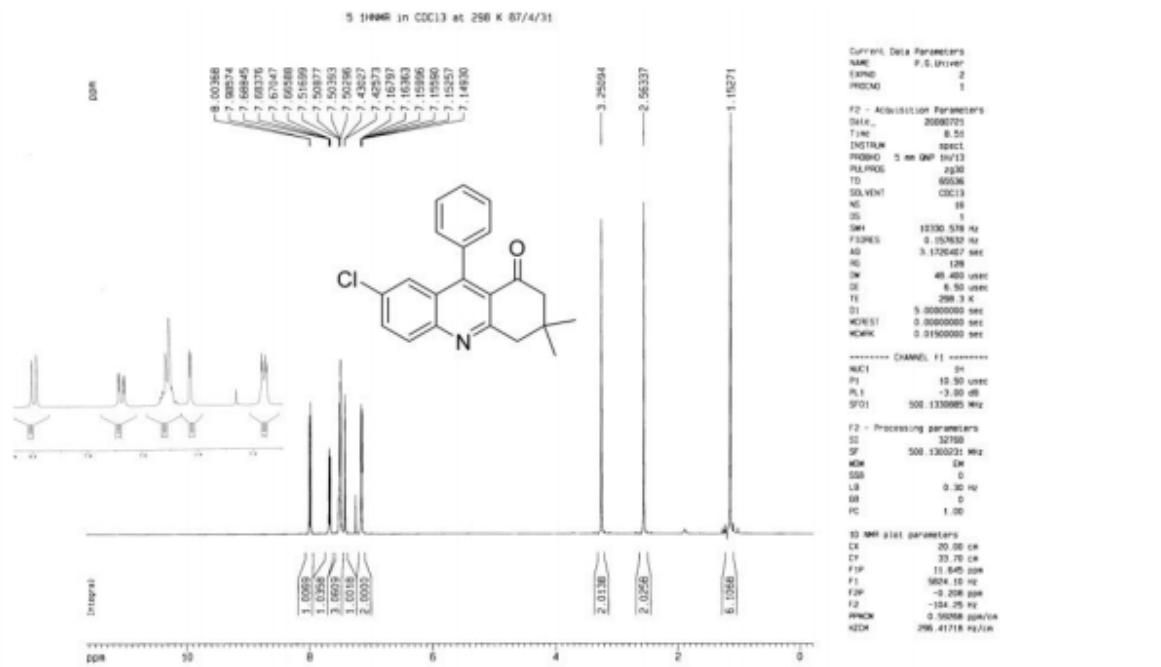

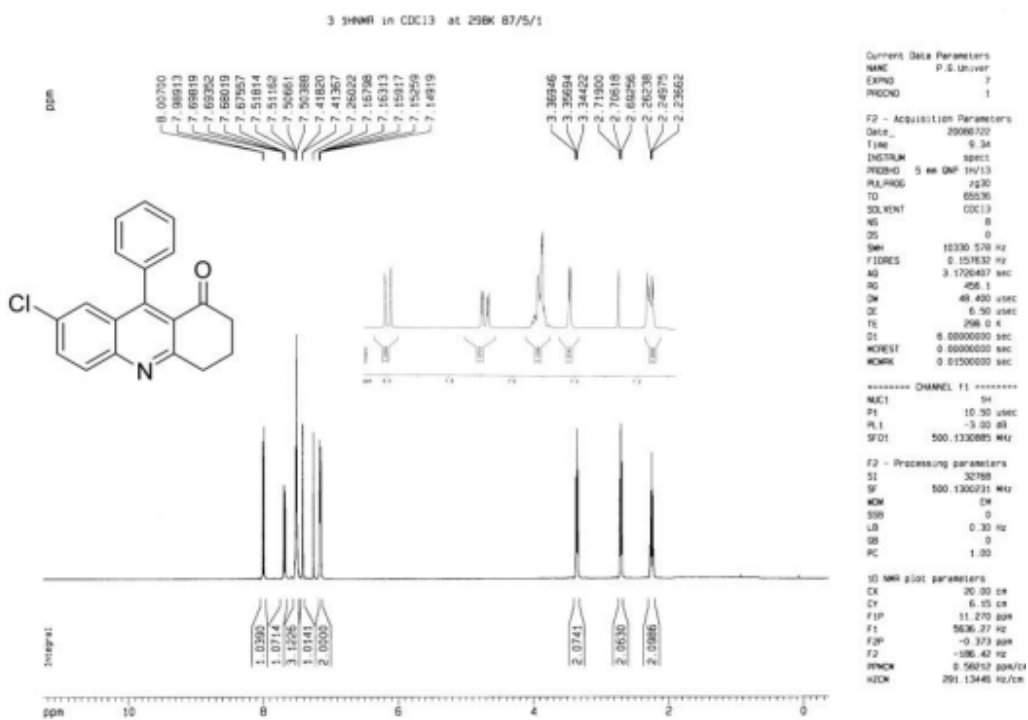



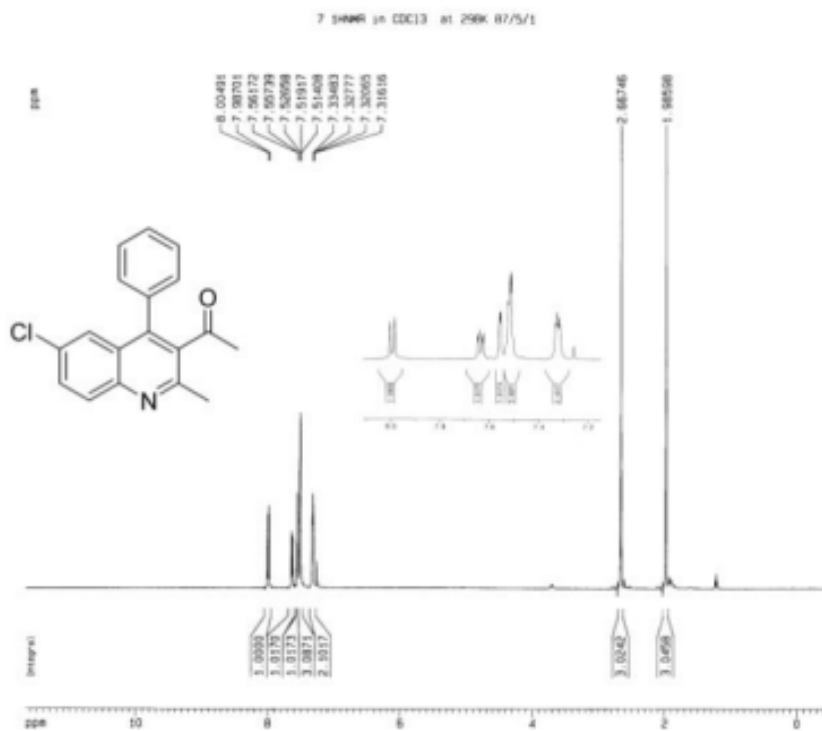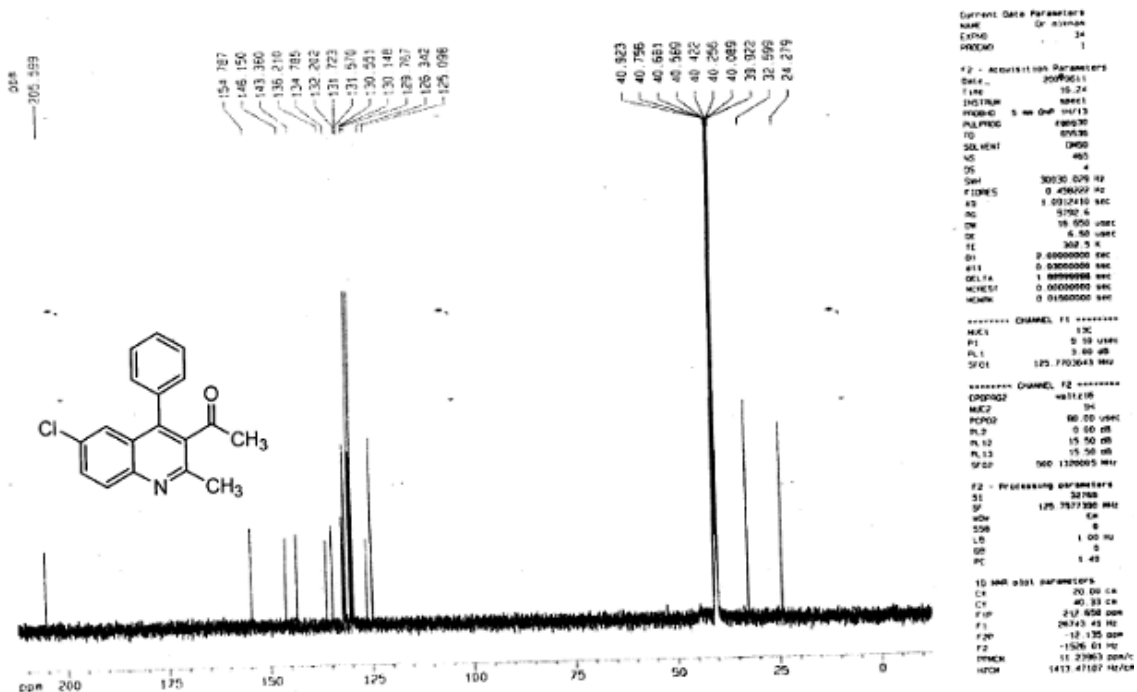



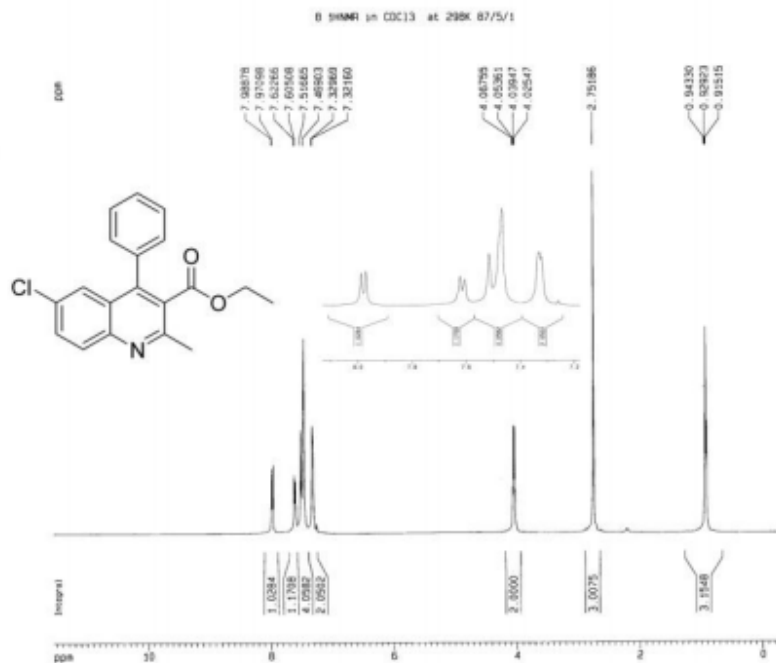

Current Data Parameters  
 NAME P.O. UNIV  
 EXPNO 8  
 PROCNO 1

F2 - Acquisition Parameters  
 Date\_ 20080722  
 Time 9.41  
 INSTRUM spect  
 PROBR 5 mm BBO 1H/1H  
 PULPROG zg30  
 TD 65536  
 SOLVENT CDCl3  
 NS 16  
 DS 1  
 SWH 16330.578 Hz  
 FIDRES 0.153520 Hz  
 AQ 3.572407 sec  
 RG 71.8  
 SW 48.400 usec  
 DE 6.50 usec  
 TE 298.2 K  
 Ds 5.0000000 sec  
 ACQSI 0.0000000 sec  
 ACQSC 0.0000000 sec

----- CHANNEL f1 -----  
 NUC1 1H  
 P1 10.50 usec  
 PL1 -3.00 dB  
 SFO1 500.1300000 MHz

F2 - Processing parameters  
 SI 32768  
 SF 500.1300000 MHz  
 WH 16  
 SSB 0  
 LB 0.30 Hz  
 GB 0  
 PC 1.00

1D NMR plot parameters  
 CX 20.00 cm  
 CY 0.64 cm  
 FFP 11.501 ppm  
 FI 5077.14 Hz  
 FSR -0.305 ppm  
 F2 -051.25 Hz  
 GAMMA 0.50000 ppm/cm  
 HZCM 296.41718 Hz/cm

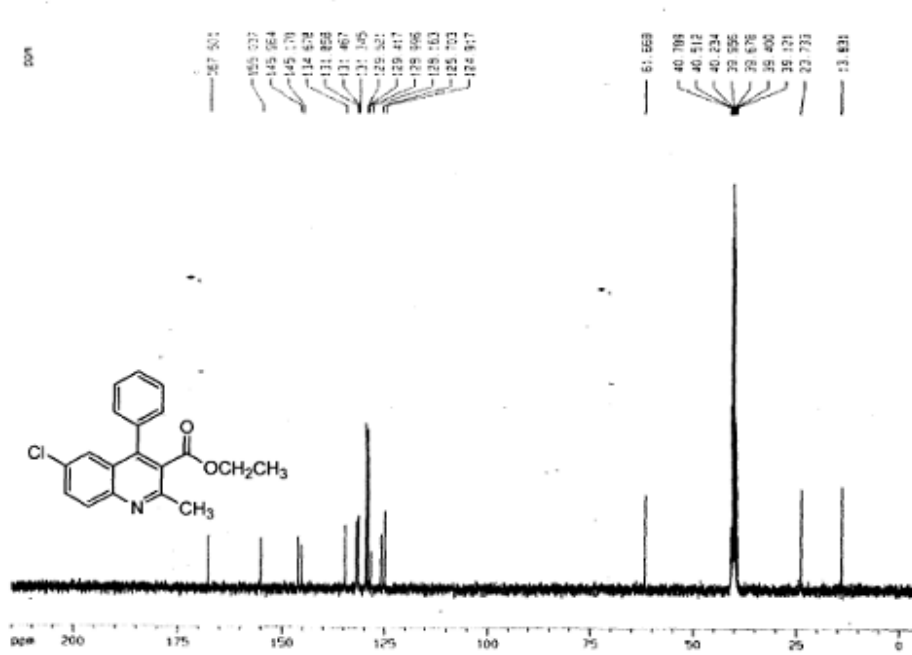

Current Data Parameters  
 NAME P.O. UNIV  
 EXPNO 8  
 PROCNO 1

F2 - Acquisition Parameters  
 Date\_ 20080722  
 Time 10.56  
 INSTRUM spect  
 PROBR 5 mm BBO 1H/1H  
 PULPROG zgpg30  
 TD 65536  
 SOLVENT CDCl3  
 NS 16  
 DS 2  
 SWH 17085.611 Hz  
 FIDRES 0.214439 Hz  
 AQ 1.6010000 sec  
 RG 2948  
 SW 27.800 usec  
 DE 6.50 usec  
 TE 300.2 K  
 Ds 2.0000000 sec  
 ACQSI 0.0000000 sec  
 ACQSC 0.0000000 sec

----- CHANNEL f1 -----  
 NUC1 13C  
 P1 8.75 usec  
 PL1 -2.00 dB  
 SFO1 125.4752703 MHz

----- CHANNEL f2 -----  
 NUC2 1H  
 P2 10.50 usec  
 PL2 -3.00 dB  
 SFO2 500.1300000 MHz

F2 - Processing parameters  
 SI 65536  
 SF 125.4752703 MHz  
 WH 16  
 SSB 0  
 LB 1.00 Hz  
 GB 0  
 PC 1.40

1D NMR plot parameters  
 CX 20.00 cm  
 CY 0.75 cm  
 FFP 215.800 ppm  
 FI 16225.53 Hz  
 FSR -5.300 ppm  
 F2 -377.34 Hz  
 GAMMA 11.00000 ppm/cm  
 HZCM 610.14526 Hz/cm

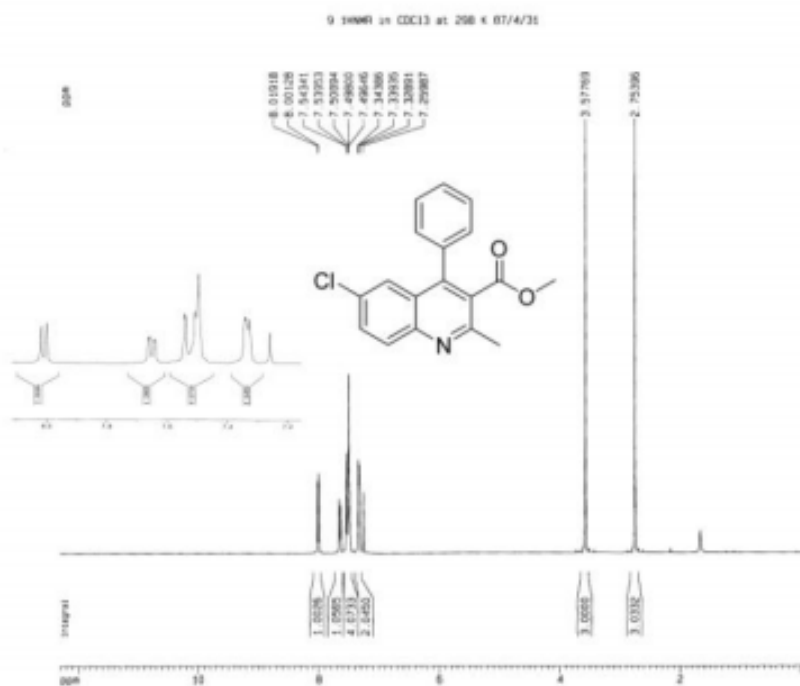

Current Data Parameters  
 NAME P-6-10000  
 EXPNO 4  
 PROCNO 1

F2 - Acquisition Parameters  
 Date\_ 20080121  
 Time 9.30  
 INSTRUM spect  
 PROBRG 5 mm QNP 1H/13  
 PULPROG zgpg30  
 TO 895.86  
 SOLVENT CDCl3  
 NS 96  
 DS 1  
 SWH 10330.576 Hz  
 FIDRES 0.157637 Hz  
 AQ 3.100000000 sec  
 RG 400.4  
 CW 48.400 uVHz  
 DE 0.50 uVHz  
 TE 299.4 K  
 CL 0.000000000 sec  
 NUC1 13  
 NUC2 1  
 NMR1 0.000000000 sec  
 NMR2 0.010000000 sec

===== CHANNEL f1 =====  
 NUC1 13  
 P1 10.50 uVHz  
 PL1 -3.50 dB  
 SFO1 506.1320000 MHz

F2 - Processing parameters  
 SI 32768  
 SF 506.1320000 MHz  
 WDR 32  
 SSB 0  
 LB 0.30 Hz  
 GB 0  
 PC 1.00

10 MHz offset parameters  
 CY 20.00 cm  
 CY 12.50 cm  
 FAP 12.300 dB  
 F1 8152.80 Hz  
 F2 -1.10 dB  
 F2 -57.20 Hz  
 PWR0 0.000000000 sec  
 NMR 360.58433 MHz

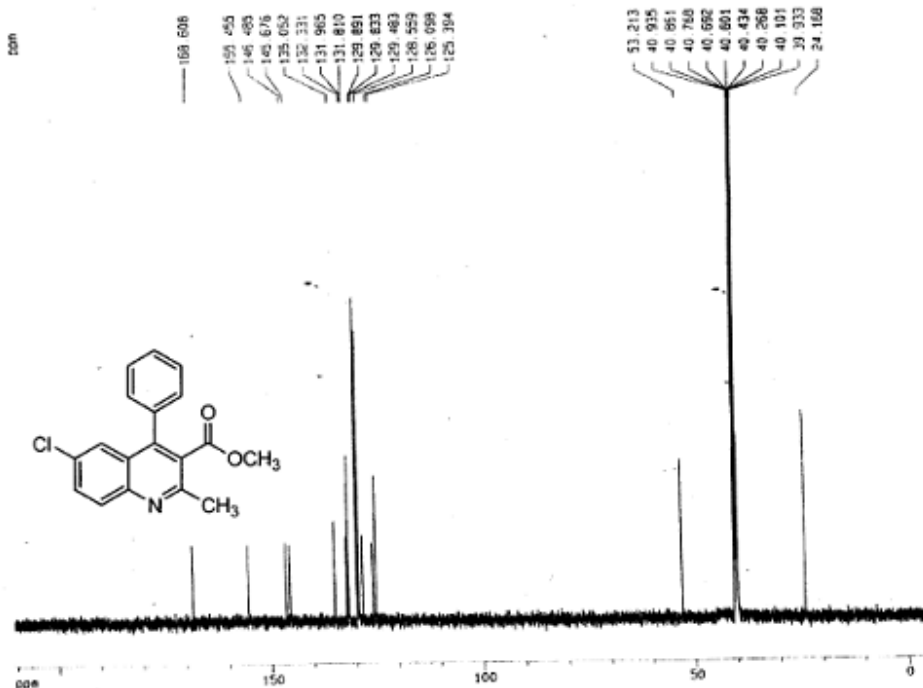

Current Data Parameters  
 NAME P-6-10000  
 EXPNO 36  
 PROCNO 1

F2 - Acquisition Parameters  
 Date\_ 20080411  
 Time 17.24  
 INSTRUM spect  
 PROBRG 5 mm QNP 1H/13  
 PULPROG zgpg30  
 TO 895.86  
 SOLVENT DMSO  
 NS 360  
 DS 4  
 SWH 30030.076 Hz  
 FIDRES 0.498002 Hz  
 AQ 1.0912410 sec  
 RG 7200.0  
 CW 18.800 uVHz  
 DE 0.50 uVHz  
 TE 300.2 K  
 CL 2.000000000 sec  
 DELTA 1.899999998 sec  
 NMR1 0.000000000 sec  
 NMR2 0.010000000 sec

===== CHANNEL f1 =====  
 NUC1 13C  
 P1 9.50 uVHz  
 PL1 -3.50 dB  
 SFO1 125.7703043 MHz

===== CHANNEL f2 =====  
 CPDPRG2 waltz16  
 NUC2 01  
 P2 80.00 uVHz  
 PL2 0.00 dB  
 PL12 15.50 dB  
 PL13 15.50 dB  
 SFO2 506.1320000 MHz

F2 - Processing parameters  
 SI 32768  
 SF 125.7703000 MHz  
 WDR 32  
 SSB 0  
 LB 1.00 Hz  
 GB 0  
 PC 1.40

10 MHz offset parameters  
 CY 20.00 cm  
 CY 30.00 cm  
 FAP 210.800 dB  
 F1 26910.87 Hz  
 F2 -4.170 dB  
 F2 -580.88 Hz  
 PWR0 10.77737 dBm/Hz  
 NMR 125.77030 MHz

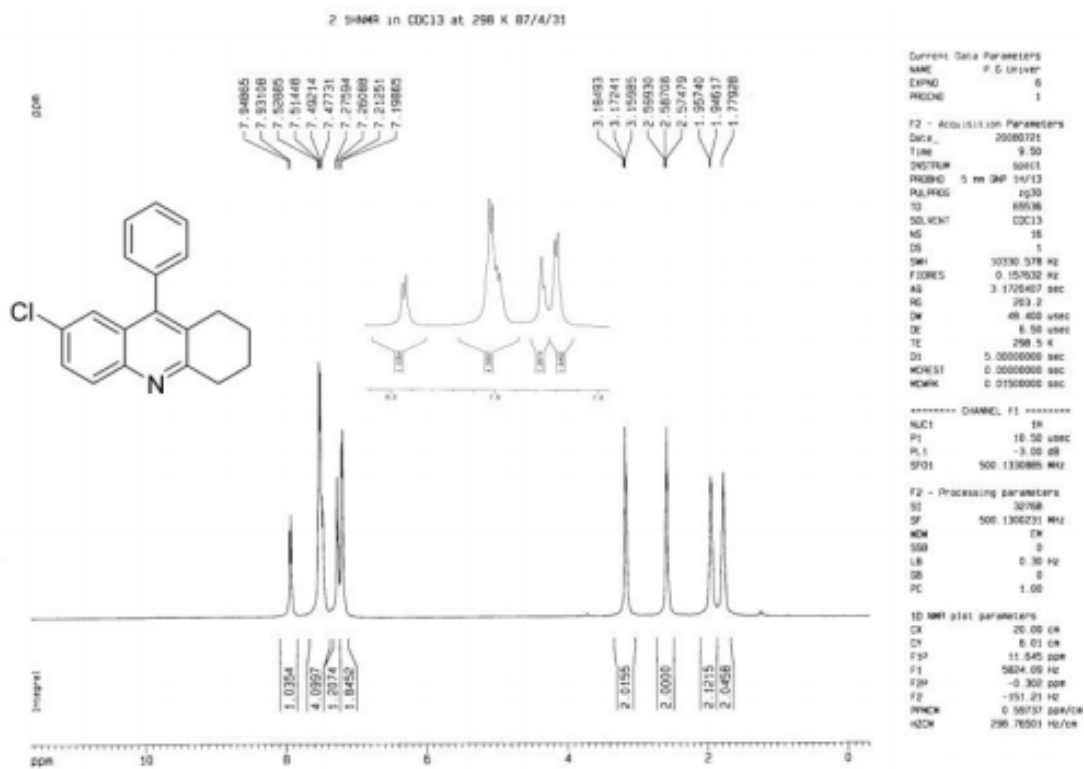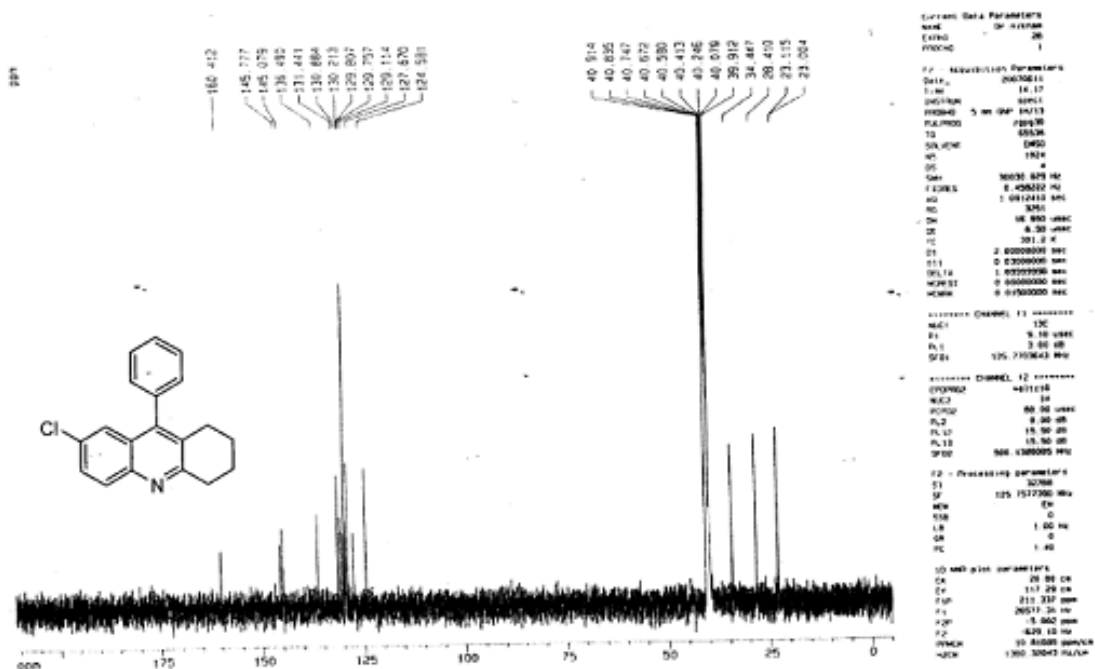

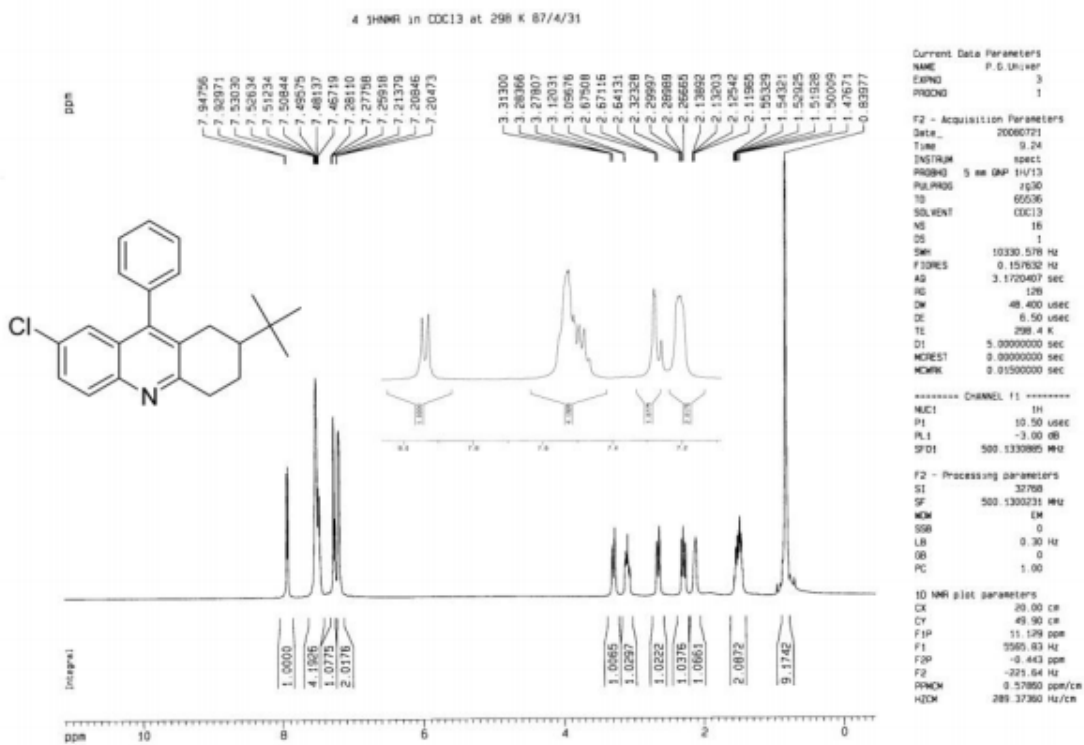

Supplement: c1cy00332a.pdf [file c1cy00332a.pdf]
